# Supplementary figures and images for: ASC amino-acid transporter 2 (ASCT2) as a novel prognostic marker in non-small cell lung cancer
Source: PubMed Central journal article supplement — Br J Cancer. 2014 Mar 6;110(8):2030–9. doi: 10.1038/bjc.2014.88 (PMC3992511; doi:10.1038/bjc.2014.88), 2014-03-06

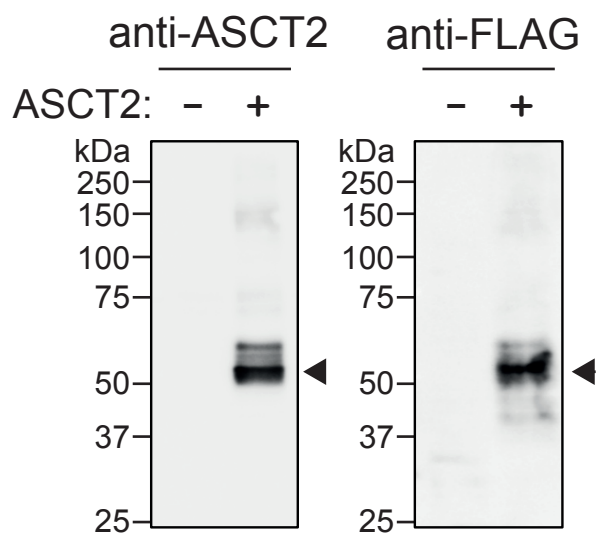

Kaira et al Supl Figure 1

Supplement: bjc201488x1.pdf [file bjc201488x1.pdf]
